# Supplementary material
Source: PubMed Central journal article supplement (PMC5774332)

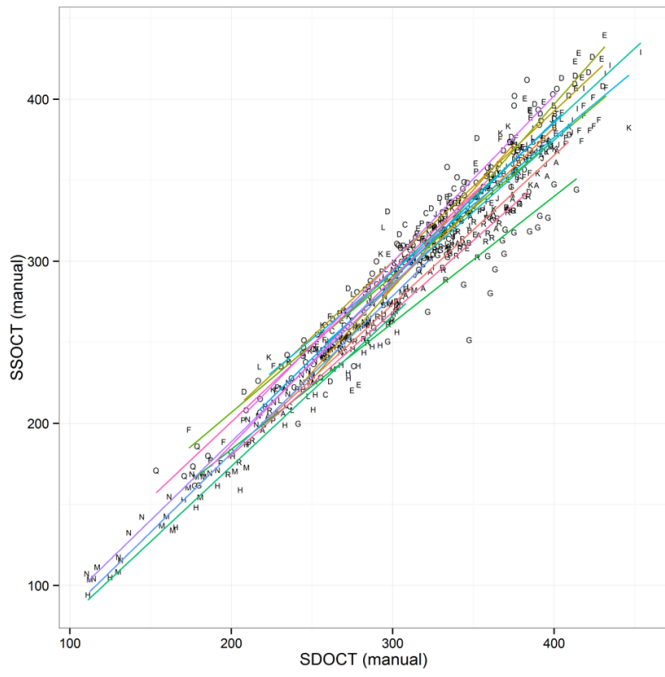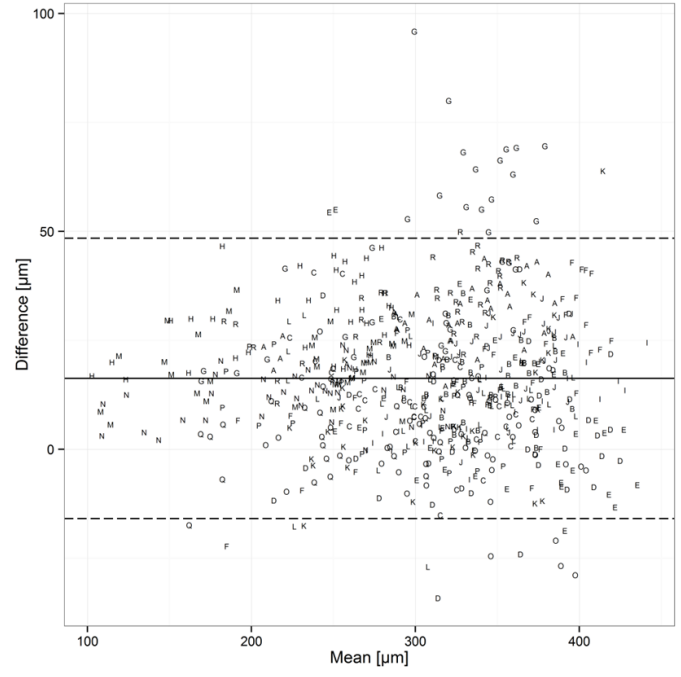

Supplementary 1

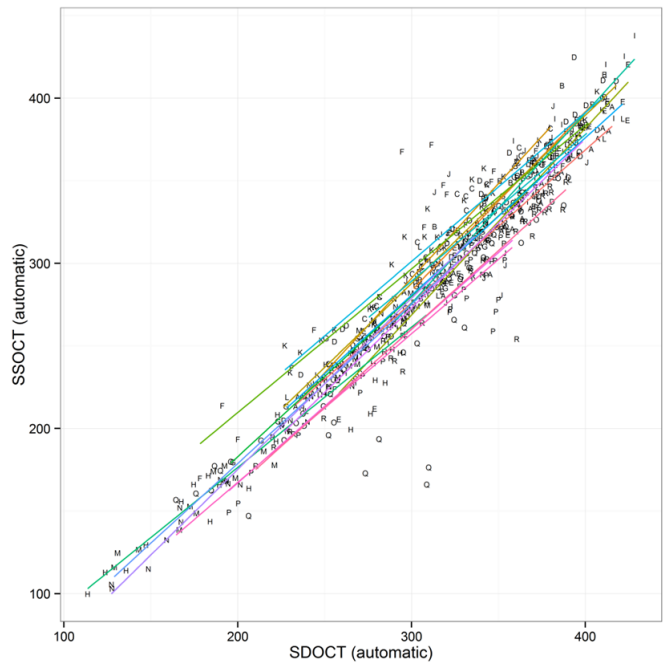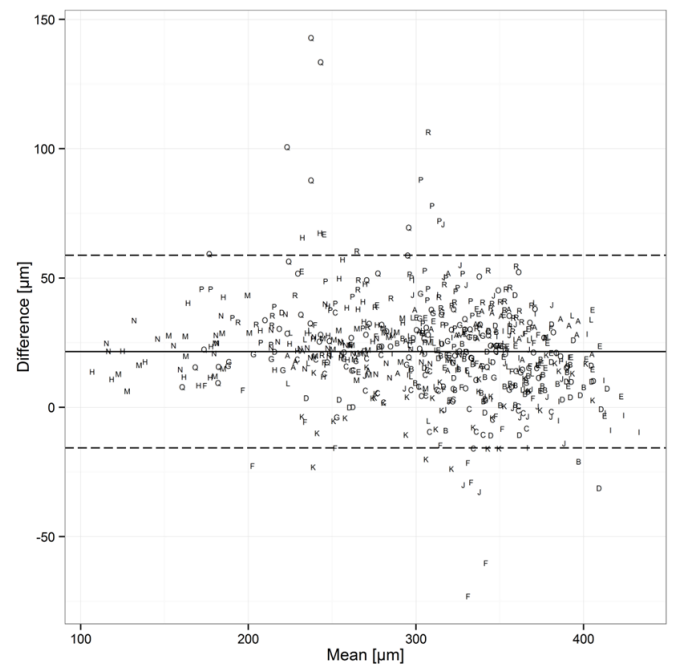

Supplementary 2

Supplement: NIHMS930312-supplement-Supplementary_1-2.pdf [file NIHMS930312-supplement-Supplementary_1-2.pdf]
